# Supplementary material
Source: PubMed Central journal article supplement (PMC3992711)
Supplement: NIHMS474943-supplement-10803_2013_1837_MOESM1_ESM.pdf [file NIHMS474943-supplement-10803_2013_1837_MOESM1_ESM.pdf]

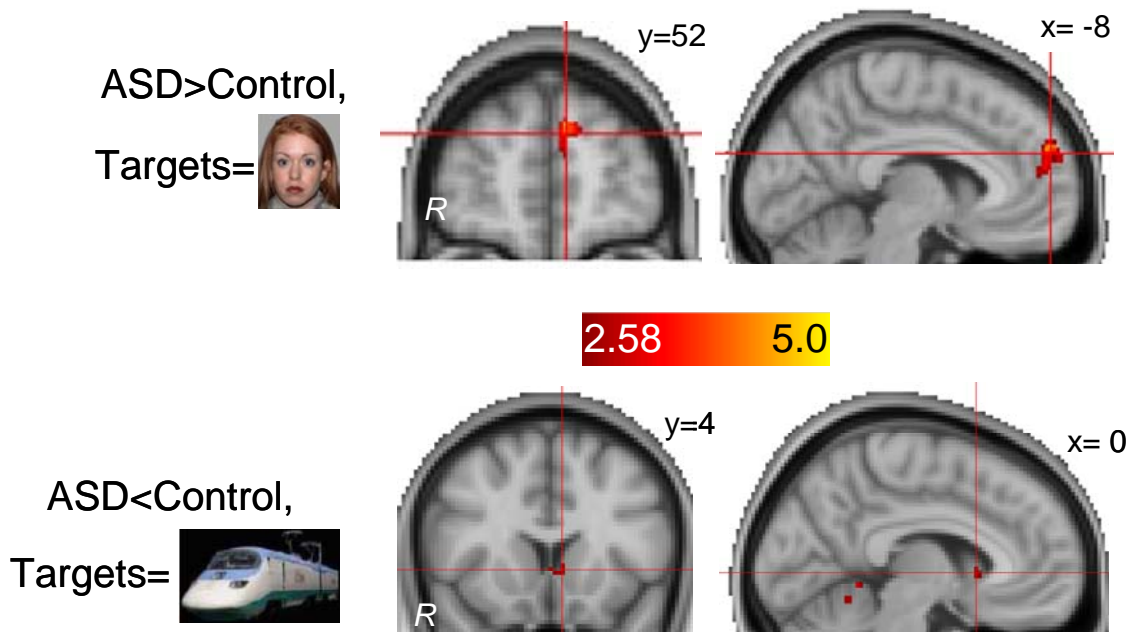

Supplementary Figure 1: fMRI Results without accuracy, reaction time, and full-scale IQ as covariates (compare to Figure 3 in the main text).
